1 **Title:**

2 Association between interruption to medical care and sickness presenteeism during the COVID-19  
3 pandemic: a cross-sectional study in Japan

4

5 **Authors:**

6 Makoto Okawara<sup>1</sup>, M.D., Tomohiro Ishimaru<sup>1</sup>, M.D., M.P.H., Ph.D., Seiichiro Tateishi<sup>2</sup>, M.D., Ph.D.,  
7 Ayako Hino<sup>3</sup>, M.D., Ph.D., Mayumi Tsuji<sup>4</sup>, M.D., Ph.D., Akira Ogami<sup>5</sup>, M.D., Ph.D., Tomohisa  
8 Nagata<sup>6</sup>, M.D., Ph.D., Shinya Matsuda<sup>7</sup>, M.D., Ph.D., Yoshihisa Fujino<sup>1</sup>, M.D., M.P.H., Ph.D., for  
9 the CORoNaWork project

10

11 **Affiliations:**

12 1 Department of Environmental Epidemiology, Institute of Industrial Ecological Sciences,  
13 University of Occupational and Environmental Health, Japan

14 2 Department of Occupational Medicine, School of Medicine, University of Occupational and  
15 Environmental Health, Japan

16 3 Department of Mental Health, Institute of Industrial Ecological Sciences, University of  
17 Occupational and Environmental Health, Japan

18 4 Department of Environmental Health, School of Medicine, University of Occupational and

19 Environmental Health, Japan

20 5 Department of Work Systems and Health, Institute of Industrial Ecological Sciences, University of

21 Occupational and Environmental Health, Japan

22 6 Department of Occupational Health Practice and Management, Institute of Industrial Ecological

23 Sciences, University of Occupational and Environmental Health, Japan

24 7 Department of Preventive Medicine and Community Health, School of Medicine, University of

25 Occupational and Environmental Health, Japan

26

27 Corresponding author:

28 Yoshihisa Fujino, M.D., M.P.H., Ph.D.

29 Department of Environmental Epidemiology, Institute of Industrial Ecological Sciences, University

30 of Occupational and Environmental Health, Japan

31 1-1, Iseigaoka, Yahatanishiku, Kitakyushu, 807-8555, Japan

32 Tel: +81-93-691-7401

33 E-mail: [zenq@med.uoeh-u.ac.jp](mailto:zenq@med.uoeh-u.ac.jp)

34

35 **Abstract**

36 Objective: This study examined the relationship between interruption to routine medical care during

37 the coronavirus disease 2019 pandemic and sickness presenteeism in Japan.

38 Methods: An internet monitor questionnaire was conducted. Data from 27,036 people were analyzed.

39 Interruption to medical care was defined based on the response “I have not been able to go to the

40 hospital or receive treatment as scheduled.” The number of sickness presenteeism days in the past 30

41 days was employed as the primary outcome. A zero-inflated negative binomial model was used for

42 analysis.

43 Results: The incidence rate ratio was significantly higher among workers who experienced

44 interrupted medical care (2.26; 95% confidence interval: 2.03–2.52) than those who did not require

45 routine medical care.

46 Conclusions: This study suggests the importance of continuing necessary treatment during a

47 pandemic to prevent presenteeism.

48

49 Keywords: occupational health; patient dropouts; presenteeism; COVID-19; regression analysis

50

51 **Introduction**

52           Sickness presenteeism is an increasingly important issue in occupational health. Aronsson  
53 defined sickness presenteeism as “people, despite complaints and ill health that should prompt rest  
54 and absence from work, still turning up at their jobs”<sup>1</sup>. Sickness presenteeism is the result of a choice  
55 made by a worker with ill-health, disease, or capacity loss between sickness presenteeism and  
56 sickness absence<sup>2</sup>. This decision is influenced by the individual's personality, values, economic  
57 status, workplace “demands for presence” and support for adaptation, and national culture and  
58 employment customs<sup>2</sup>. Evidence suggests that sickness presenteeism can lead to sickness absence  
59 and future worsening of physical and mental health conditions<sup>3-9</sup>. In addition, the impact of working  
60 while ill on productivity is also gaining attention, especially in the US<sup>10,11</sup>. A variety of diseases and  
61 health conditions have been found to be associated with sickness presenteeism, suggesting the  
62 importance of managing disease and maintaining good condition<sup>4,12</sup>.

63           Under the coronavirus disease 2019 (COVID-19) pandemic, there is concern that both  
64 organizational and individual factors will increase sickness presenteeism above that observed under  
65 normal conditions<sup>13-15</sup>. Organizational factors that may lead to more sickness presenteeism include  
66 increased workload and working hours per person, increased work pressure due to a manpower  
67 shortage in the organization and changes in work demands on short notice during the pandemic. This

68 increased workload on workers can lead to a negative work culture around taking sick leave, such as  
69 where workers who choose to work while ill are valued for their loyalty to the company and  
70 motivation to work, thus promoting sickness presenteeism<sup>16</sup>. Examples of individual factors that may  
71 increase sickness presenteeism include worsening economic situations and job insecurity; increased  
72 telecommuting, which can make it easier for workers to work even while sick; the impact of the  
73 pandemic on anxiety and mental health; worsening of health conditions and diseases due to lifestyle  
74 changes; and worsening of chronic diseases due to the inability to access medical resources. All of  
75 these factors are expected to lead to an increase in sickness presenteeism.

76 Interruption to medical care is an important problem in the COVID-19 pandemic. Access to  
77 necessary routine medical care and medical resources is reportedly being affected in many countries  
78 around the world<sup>17-19</sup>. In Japan, there is data showing that the number of prescriptions issued has  
79 decreased<sup>20</sup>. There are multiple reasons for such interruptions to medical care, including fear of  
80 being infected with COVID-19 when leaving the house to visit a hospital, worsening personal  
81 economic situations, and shortages in medical personnel, all of which affect the treatment schedule  
82 for chronic diseases<sup>21</sup>. Interruption to medical care can adversely affect management of chronic  
83 diseases and delay the detection and treatment of new diseases<sup>22</sup>. In fact, excess deaths unrelated to  
84 COVID-19 have been reported<sup>23</sup>. Thus, interruption to medical care during the COVID-19 pandemic  
85 may lead to worsening of non-COVID-19 diseases and health conditions.

86           During the COVID-19 pandemic, the number of people working while ill may increase as a  
87 result of worsening health conditions arising from treatment interruptions and delays. This may  
88 result in an increase in sickness presenteeism. However, few studies have examined the effect of  
89 medical care interruption on sickness presenteeism during the COVID-19 pandemic. We  
90 hypothesized that sickness presenteeism has increased among workers who experienced  
91 interruptions to their medical care during the COVID-19 pandemic. The purpose of this study was to  
92 examine the association between medical care interruption and sickness presenteeism in Japanese  
93 workers during the COVID-19 pandemic.

94

## 95   **Materials and Methods**

96           We performed a cross-sectional study based on baseline survey data obtained in the  
97 Collaborative Online Research on the Novel- Coronavirus and Work (CORoNaWork) project, a  
98 prospective cohort study that performed a questionnaire-based survey of Internet monitors to  
99 determine the effect of the COVID-19 pandemic on workers' health. Before completing the online  
100 survey, participants read a description of the survey's aims and details about the handling of their  
101 information. Only participants who agreed with the contents of the description were allowed to

102 participate. Participation was anonymized. This study was approved by the Ethics Committee of the  
103 University of Occupational and Environmental Health, Japan (Approval No. R2-079 and R3-006).

104 The baseline survey was conducted from December 22 to 26, 2020. A total of 33,302  
105 participants aged from 20 and 65 years who indicated they were working when completing the  
106 survey were included. Participants were selected such that sex and occupation (office and non-office  
107 workers) were approximately equal among the regions of residence. Regions of residence were  
108 categorized according to the cumulative COVID-19 infection rate. Participants who provided  
109 fraudulent responses (n=6,266) according to the survey company or a predefined definition of a  
110 fraudulent response were excluded. Fraudulent responses included an unusually short response time  
111 (below 6 minutes), unusually short height (below 140 cm), unusually low weight (below 30 kg),  
112 varying answers to similar questions in the survey (e.g., varying answers to questions about marital  
113 status or area of residence), and incorrect answers to tiered questions used to identify inappropriate  
114 responses (e.g., choose the third highest number from the following five numbers). After exclusion,  
115 responses from 27,036 participants were included in the analysis.

116

117 Assessment of treatment status

118           We assessed the presence of disease and participants' need for medical care using the  
119 following question: "Do you have a disease that requires regular visits to the hospital or treatment?"  
120 Responses were "I do not have any such disease"; "I am able to go to the hospital or receive  
121 treatment as scheduled"; "I have not been able to go to the hospital or receive treatment as  
122 scheduled."

123           Those who answered "I do not have any such disease" were defined as workers who did not  
124 require routine medical care, and thus did not have any disease that requires hospital visits or  
125 treatment. Those who answered "I am able to go to the hospital or receive treatment as scheduled"  
126 were defined as workers who used medical care. Those who answered "I have not been able to go to  
127 the hospital or receive treatment as scheduled" were defined as workers who experienced interrupted  
128 medical care.

129

130           Assessment of sickness presenteeism and other covariates

131           Respondents' number of sickness presenteeism days was ascertained based on the following  
132 question and used as the primary outcome: "In the last 30 days, how many days have you worked  
133 (including work from home) despite feeling that you really should have taken sick leave due to your  
134 state of health?"



135           Socioeconomic and work-related factors included sex, age, job type (mainly desk work,  
136   mainly interpersonal communication, mainly physical work), marital status (married,  
137   divorced/deceased, never married), annual household income, education (junior high school, high  
138   school, vocational school/junior college/college of technology, university/graduate school), company  
139   size (total number of employees in the respondent’s main place of work [1 for self-employed]), and  
140   the number of days worked per week.

141           The cumulative infection rate of COVID-19 in the province of residence was employed as a  
142   community-level variable.

143           To control for potential confounders, we also asked participants to indicate their main  
144   symptoms using the following question: “Which of the following conditions or body parts give you  
145   the most trouble during your work?” The options were “No problem”; “pain”; “movement”;  
146   “tightness, loss of energy, appetite, fever, dizziness, or feeling poor”; “toileting or elimination”;  
147   “mental health”; “skin, hair, or beauty”; “sleep”; “eyes”; “nose”; “ears”; and “other.”

148

149   Statistical analysis

150           Age and the number of sickness presenteeism days were expressed as continuous variables,  
151   with median and interquartile range (IQR). Other covariates were expressed as categorical variables  
152   using percentages.

153           We compared the results of linear regression, Poisson regression, Zero-inflated Poisson  
154   regression (ZIP), negative binomial regression, and Zero-inflated Negative Binomial regression  
155   (ZINB) as statistical models, as they treat the number of sickness presenteeism days as continuous  
156   count data. Negative binomial regression can handle over-dispersed data, where the variance is much  
157   higher than the mean, which cannot be assumed in Poisson distribution. Further, to handle data with  
158   excess zeros, which indicates a population at low risk of sickness presenteeism, we used a  
159   zero-inflated model. In addition to dealing with the excess zeros that often occur in count data, a  
160   zero-inflated model has also been proposed as a way to handle the difficulty of defining sickness  
161   presenteeism cutoffs<sup>24,25</sup>. As a measure of model fitness, we compared the Akaike's Information  
162   Criterion (AIC), and ultimately adopted the ZINB model.

163           ZINB regression analysis was conducted with the number of continuous sickness  
164   presenteeism days as the dependent variable, the respondents' category of treatment status as an  
165   independent variable, and the number of days worked per week as an offset variable.

166           We adjusted for the following potential confounders: sex, age, job type, marital status,  
167 household income, education, company size, cumulative infection rate by prefecture, and main  
168 symptoms.

169           In further analysis, we estimated the margins of sickness presenteeism days for each  
170 treatment status and symptom. First, we used the same statistical model as that in the main analysis.  
171 Second, we calculated the predictive margins of sickness presenteeism days, substituting measured  
172 values for other covariates, dividing the data into 36 groups (3 treatment statuses and 12  
173 symptoms)<sup>26</sup>. Preliminarily, we confirmed the simple main effects for each treatment status  
174 compared to workers who did not require routine medical care by adding the interaction term  
175 between treatment status and symptoms to the model used for the main analysis. For all analyses, the  
176 Bonferroni method was used to adjust for multiple comparisons.

177           All comparisons were performed in Stata (Stata Statistical Software: Release 16; StataCorp  
178 LLC, TX, USA), with  $p < 0.05$  indicating statistical significance.

179

180   **Results**

181           Of the 33,302 responses, 6,266 were excluded (215 were deemed fraudulent according to  
182           the survey company and 6,051 satisfied the exclusion criteria during data cleaning), leaving a total of  
183           27,036 responses for analysis. Because all responses were mandatory, there were no missing data in  
184           this study.

185           The demographic and sociological characteristics of the analyzed population are shown in  
186           Table 1. A total of 13,814 (51%) were men, with a median age of 48 years (IQR: 39–55). Of the total  
187           population, 17,526 (65%) were workers who did not require routine medical care, 8,451 (31%) were  
188           using medical care as scheduled, and 1,059 (4%) experienced interrupted medical care. The overall  
189           median number of sickness presenteeism days was 0.0 (IQR: 0–2). The distribution of sickness  
190           presenteeism is shown for the three treatment statuses in a histogram in Figure 1.

191           The association between the number of sickness presenteeism days and treatment status is  
192           shown in Table 2. There was a significant association between the number of sickness presenteeism  
193           days and treatment status based on the count model part of ZINB. After adjusting for other  
194           covariates in the multivariate model, the incidence rate ratio (IRR) of sickness presenteeism days  
195           was significantly higher among workers who used medical care (IRR: 1.15, 95% CI: 1.08–1.22,  
196            $p < 0.001$ ) and workers who experienced interrupted medical care (IRR: 2.26, 95% CI: 2.03–2.52,  
197            $p < 0.001$ ) compared to workers who did not require routine medical care.

198           The association between the number of sickness presenteeism days and participants' main  
199 symptoms is shown in Table 3. There were significant associations between the number of sickness  
200 presenteeism days and some symptoms using the model presented in Table 2. The highest IRR of  
201 sickness presenteeism days was observed for mental health symptoms (adjusted IRR: 1.67, 95% CI:  
202 1.52–1.83,  $p<0.001$ ).

203           The predictive margins of sickness presenteeism days for each treatment status and  
204 symptom are shown in Table 4 and Figure 2. When the analysis was performed based on the three  
205 treatment statuses, irrespective of symptom, the predictive margin of sickness presenteeism days  
206 among workers who experienced interrupted medical care was 7.06 days (standard error [SE]=0.34),  
207 while that among workers who did not require routine medical care was 1.43 days (SE=0.03). When  
208 the analysis was performed based on the 36 treatment-symptom groups (3 treatment statuses and 12  
209 symptoms), the largest predictive margin of sickness presenteeism days was observed for mental  
210 health symptoms AND interrupted medical care (PM: 10.05 days, SE=0.57). The simple effect  
211 comparisons test, which included the interaction term between treatment status and symptoms,  
212 showed that there were significant differences between workers with the same symptoms who did  
213 and did not require routine medical care, and between workers with the same symptoms who  
214 experienced interruption to medical care and who did not require routine medical care. For example,  
215 the number of sickness presenteeism days significantly differed between those with mental health

216 symptoms who used medical care and those with mental health symptoms who did not require

217 routine medical care ( $p<0.001$ ).

218

## 219 **Discussion**

220 This study demonstrated an association between treatment interruption and sickness

221 presenteeism among Japanese workers in the COVID-19 pandemic. Compared to workers who did

222 not require routine medical care, workers who had diseases that required routine medical care

223 reported more days of sickness presenteeism, and those who experienced interrupted medical care

224 reported even more such days. Furthermore, our findings reveal differences in the occurrence of

225 sickness presenteeism depending on workers' symptoms.

226 We found that workers who experienced interrupted medical care had increased sickness

227 presenteeism. This is because appropriate treatment can improve work function and productivity by

228 improving workers' health and subjective symptoms<sup>10,27</sup>. This is supported by the fact that workers

229 who used medical care reported fewer sickness presenteeism days than those who experienced

230 interrupted medical care, although workers who used medical care had a higher incidence of

231 sickness presenteeism than workers who did not require routine medical care. Employees who

232 experience interrupted treatment for chronic diseases may be forced to return to work due to fear of

233 being laid off, depending on the financial situation of their workplace during the pandemic. It is thus  
234 important to continue regular treatment during the COVID-19 pandemic to manage disease and  
235 maintain good condition<sup>28</sup>.

236 We found that the occurrence of sickness presenteeism depends on the type of symptoms  
237 experienced by workers. Workers with symptoms related to mental health problems, loss of  
238 energy/fever, and body movements reported more sickness presenteeism than those who reported  
239 having “no problem.” In contrast, workers with symptoms related to sleep, pain, and elimination  
240 reported comparable or fewer days of sickness presenteeism to those who reported having “no  
241 problem.” Sickness presenteeism is the result of a worker's choice to be absent from work or to  
242 attend work despite being unwell. Many previous studies have evaluated sickness presenteeism  
243 based on whether or not workers “worked one or more days in a certain period of time with a health  
244 condition for which they think they really should be absent”<sup>2,29</sup>. However, workers experiencing  
245 symptoms not typically associated with sickness presenteeism may not consider their symptoms  
246 suitable for an absence from work, and thus may not have indicated that they experienced sickness  
247 presenteeism. For example, symptoms related to beauty are not directly related to an individual's  
248 ability to work; sleep may be considered something that the individual simply needs to get more of  
249 on holidays; and chronic pain may be considered an instruction to move rather than rest. However,  
250 some symptoms that can pose a health risk are also unlikely to be recognized as contributing to

251 sickness presenteeism. These include symptoms that can lead to delayed detection or worsening of a  
252 disease if left untreated when rest or treatment is in fact required. For individuals with insomnia or  
253 elimination symptoms, for example, resting or visiting a hospital when feeling unwell can lead to  
254 prevention or early diagnosis and treatment of mental health problems or inflammatory bowel  
255 disease, respectively. While forcing oneself to work with such symptoms can pose a health risk,  
256 workers may not consider this sickness presenteeism due to differences in interpretation of “health  
257 conditions that require absence from work.” This is an important point when evaluating sickness  
258 presenteeism.

259         We also found that the impact of continuing treatment on the prevention of sickness  
260 presenteeism varied by symptom. Sickness presenteeism was more frequent in workers who  
261 experienced interrupted medical care with symptoms related to tightness and loss of energy, toileting  
262 and elimination, sleep, and eyes than those who did not require routine medical care. In contrast, no  
263 difference in sickness presenteeism was observed between workers who used medical care and those  
264 who did not require routine medical care, suggesting the importance of continuing necessary routine  
265 medical care for preventing sickness presenteeism due to these symptoms. Workers who experienced  
266 interrupted medical care with these symptoms may be able to reduce the incidence of sickness  
267 presenteeism by continuing appropriate treatment to maintain and improve their health condition.  
268 Symptoms that led to more sickness presenteeism in both workers who used medical care and



269 workers who experienced interrupted medical care compared to workers who did not require routine  
270 medical care were pain and mental health-related symptoms. For these symptoms, sickness  
271 presenteeism remained high even with continued treatment, indicating the need to identify  
272 appropriate treatment and manage one's daily health condition in addition to continuing treatment. In  
273 contrast, symptoms that led to comparable sickness presenteeism in workers who used medical care  
274 and workers who experienced interrupted medical care compared to workers who did not require  
275 routine medical care were related to movement and mobility; skin, hair, or beauty; nose; ears; and  
276 other symptoms, for which treatment is ineffective to prevent sickness presenteeism. The lack of a  
277 difference in sickness presenteeism for these symptoms may be due to the fact that individuals do  
278 not consider these symptoms sufficiently adverse to require an absence from work. Alternatively,  
279 some individuals, such as those with physical movement symptoms, may experience chronic  
280 symptoms for which support and adaptive behaviors have already been put into place; thus, whether  
281 or not these individuals experience sickness presenteeism may be unrelated to their treatment status.  
282 Thus, the impact of continuing treatment on sickness presenteeism may be related to whether an  
283 individual considers their symptoms to be sufficiently adverse to require an absence from work, or  
284 whether or not the symptoms can be improved with treatment.

285           There are several limitations to this study. First, we did not obtain detailed information  
286 related to treatment interruptions, including the type of disease, duration, and reasons for interruption.

287 We were thus unable to determine whether the reason for interruption to treatment was due to  
288 patient-related reasons (e.g., economic situation and anxiety) or hospital-related reasons (e.g.,  
289 schedule adjustment). Second, interruptions to treatment may be the result of better disease control  
290 and improved health. It is unclear how these factors would affect the occurrence of sickness  
291 presenteeism. Finally, we did not consider all possible confounders affecting sickness presenteeism  
292 because we did not obtain information on some confounders, such as job insecurity, annual leave  
293 rights, and the culture around employment and sick leave in each company.

294

## 295 **Conclusion**

296 Interruption to medical care during the COVID-19 pandemic was associated with the  
297 occurrence of sickness presenteeism. This study demonstrates the importance of maintaining one's  
298 health condition and continuing necessary treatment even during an infectious disease pandemic.

299

300 References

- 301 1. Aronsson G, Gustafsson K, Dallner M. Sick but yet at work. An empirical study of sickness  
302 presenteeism. *J Epidemiol Community Health*. 2000;54: 502–509.
- 303 2. Aronsson G, Gustafsson K. Sickness presenteeism: prevalence, attendance-pressure factors, and  
304 an outline of a model for research. *J Occup Environ Med*. 2005;47: 958–966.
- 305 3. Skagen K, Collins AM. The consequences of sickness presenteeism on health and wellbeing  
306 over time: A systematic review. *Soc Sci Med*. 2016;161: 169–177.
- 307 4. Johns G. Presenteeism in the workplace: A review and research agenda. *J Organ Behav*.  
308 2010;31: 519–542.
- 309 5. Kivimäki M, Head J, Ferrie JE, Hemingway H, Shipley MJ, Vahtera J, et al. Working while ill  
310 as a risk factor for serious coronary events: the Whitehall II study. *Am J Public Health*.  
311 2005;95: 98–102.
- 312 6. Janssens H, Clays E, De Clercq B, De Bacquer D, Braeckman L. The relation between  
313 presenteeism and different types of future sickness absence. *J Occup Health*. 2013;55: 132–141.
- 314 7. Bergström G, Bodin L, Hagberg J, Aronsson G, Josephson M. Sickness presenteeism today,  
315 sickness absenteeism tomorrow? A prospective study on sickness presenteeism and future  
316 sickness absenteeism. *J Occup Environ Med*. 2009;51: 629–638.
- 317 8. Gustafsson K, Marklund S. Associations between health and combinations of sickness presence  
318 and absence. *Occup Med* . 2014;64: 49–55.
- 319 9. Gustafsson K, Marklund S. Consequences of sickness presence and sickness absence on health  
320 and work ability: a Swedish prospective cohort study. *Int J Occup Med Environ Health*.  
321 2011;24: 153–165.
- 322 10. Schultz AB, Chen C-Y, Edington DW. The cost and impact of health conditions on  
323 presenteeism to employers: a review of the literature. *Pharmacoeconomics*. 2009;27: 365–378.
- 324 11. Nagata T, Mori K, Ohtani M, Nagata M, Kajiki S, Fujino Y, et al. Total Health-Related Costs  
325 Due to Absenteeism, Presenteeism, and Medical and Pharmaceutical Expenses in Japanese  
326 Employers. *J Occup Environ Med*. 2018;60: e273–e280.
- 327 12. Burton WN, Pransky G, Conti DJ, Chen C-Y, Edington DW. The association of medical  
328 conditions and presenteeism. *J Occup Environ Med*. 2004;46: S38-45.

- 329 13. Reuter M, Dragano N, Wahrendorf M. Working while sick in context of regional  
330 unemployment: a Europe-wide cross-sectional study. *J Epidemiol Community Health*. 2021;75:  
331 574–580.
- 332 14. Tilchin C, Dayton L, Latkin CA. Socioeconomic Factors Associated With an Intention to Work  
333 While Sick From COVID-19. *J Occup Environ Med*. 2021;63: 363–368.
- 334 15. Kinman G, Grant C. Presenteeism during the COVID-19 pandemic: risks and solutions. *Occup  
335 Med* . 2020. doi:10.1093/occmed/kqaa193
- 336 16. Kinman G. Sickness presenteeism at work: prevalence, costs and management. *Br Med Bull*.  
337 2019;129: 69–78.
- 338 17. Das AK, Mishra DK, Gopalan SS. Reduced access to care among older American adults during  
339 CoVID-19 pandemic: results from a prospective cohort study. *bioRxiv*. medRxiv; 2020.  
340 doi:10.1101/2020.11.29.20240317
- 341 18. Czeisler MÉ, Mpp KM, Clarke KEN, Salah Z, Shakya I, Thierry JAM, et al. Delay or  
342 avoidance of medical care because of COVID-19–related concerns — .  
343 doi:10.1101/2020.04.22.20076141v1
- 344 19. van Ballegooijen H, Goossens L, Bruin RH, Michels R, Krol M. Concerns, quality of life,  
345 access to care and productivity of the general population during the first 8 weeks of the  
346 coronavirus lockdown in Belgium and the Netherlands. *BMC Health Serv Res*. 2021;21: 227.
- 347 20. Lopresti M Seo T Sato. Pandemics and access to care: use of real-world DATA to examine the  
348 IMPACT of COVID-19 on pharmacy visits in Japan. *Value Health*. [cited 28 May 2021].  
349 doi:10.1016/j.jval.2020.08.1707
- 350 21. Bong C-L, Brasher C, Chikumba E, McDougall R, Mellin-Olsen J, Enright A. The COVID-19  
351 Pandemic: Effects on Low- and Middle-Income Countries. *Anesth Analg*. 2020;131: 86–92.
- 352 22. Erol MK, Kayıkçıoğlu M, Kılıçkap M, Güler A, Yıldırım A, Kahraman F, et al. Treatment  
353 delays and in-hospital outcomes in acute myocardial infarction during the COVID-19  
354 pandemic: A nationwide study. *Anatol J Cardiol*. 2020;24: 334–342.
- 355 23. Woolf SH, Chapman DA, Sabo RT, Weinberger DM, Hill L. Excess Deaths From COVID-19

- 356 and Other Causes, March-April 2020. *JAMA*. 2020;324: 510–513.
- 357 24. Navarro A, Salas-Nicás S, Llorens C, Moncada S, Molinero-Ruíz E, Moriña D. Sickness  
358 presenteeism: Are we sure about what we are studying? A research based on a literature review  
359 and an empirical illustration. *Am J Ind Med*. 2019;62: 580–589.
- 360 25. Tashiro Y, Nakamura K, Seino K, Ochi S, Ishii H, Hasegawa M, et al. The impact of a  
361 school-based tooth-brushing program on dental caries: a cross-sectional study. *Environ Health  
362 Prev Med*. 2019;24: 83.
- 363 26. Williams R. Using the Margins Command to Estimate and Interpret Adjusted Predictions and  
364 Marginal Effects. *Stata J*. 2012;12: 308–331.
- 365 27. Burton WN, Morrison A, Wertheimer AI. Pharmaceuticals and worker productivity loss: a  
366 critical review of the literature. *J Occup Environ Med*. 2003;45: 610–621.
- 367 28. Chudasama YV, Gillies CL, Zaccardi F, Coles B, Davies MJ, Seidu S, et al. Impact of  
368 COVID-19 on routine care for chronic diseases: A global survey of views from healthcare  
369 professionals. *Diabetes Metab Syndr*. 2020;14: 965–967.
- 370 29. Hansen CD, Andersen JH. Going ill to work--what personal circumstances, attitudes and  
371 work-related factors are associated with sickness presenteeism? *Soc Sci Med*. 2008;67:  
372 956–964.

Table 1. Basic characteristics of the study subjects

|                                                         | Total<br>(n=27,036) | Workers who did<br>not require<br>routine medical<br>care<br>(n= 17,526) | Workers who<br>used medical<br>care<br>(n=8,451) | Workers who<br>experienced<br>interrupted medical<br>care<br>(n=1,059) |
|---------------------------------------------------------|---------------------|--------------------------------------------------------------------------|--------------------------------------------------|------------------------------------------------------------------------|
|                                                         | n (%)               | n (%)                                                                    | n (%)                                            | n (%)                                                                  |
| Age, median (IQR)                                       | 48 (39-55)          | 46 (38-53)                                                               | 52 (45-58)                                       | 47 (39-54)                                                             |
| Sex, men                                                | 13814 (51.1%)       | 8422 (48.1%)                                                             | 4885 (57.8%)                                     | 507 (47.9%)                                                            |
| Marital status, married                                 | 15029 (55.6%)       | 9627 (54.9%)                                                             | 4894 (57.9%)                                     | 508 (48.0%)                                                            |
| Job type                                                |                     |                                                                          |                                                  |                                                                        |
| Mainly desk work                                        | 13468 (49.8%)       | 8545 (48.8%)                                                             | 4440 (52.5%)                                     | 483 (45.6%)                                                            |
| Mainly interpersonal communication                      | 6927 (25.6%)        | 4621 (26.4%)                                                             | 2032 (24.0%)                                     | 274 (25.9%)                                                            |
| Mainly physical work                                    | 6641 (24.6%)        | 4360 (24.9%)                                                             | 1979 (23.4%)                                     | 302 (28.5%)                                                            |
| Equivalent income (Japanese Yen)                        |                     |                                                                          |                                                  |                                                                        |
| 550000-2500000                                          | 5710 (21.1%)        | 3636 (20.7%)                                                             | 1800 (21.3%)                                     | 274 (25.9%)                                                            |
| 2500000-4250000                                         | 7550 (27.9%)        | 5036 (28.7%)                                                             | 2227 (26.4%)                                     | 287 (27.1%)                                                            |
| 4250000-5500000                                         | 6625 (24.5%)        | 4353 (24.8%)                                                             | 2039 (24.1%)                                     | 233 (22.0%)                                                            |
| >5500000                                                | 7151 (26.4%)        | 4501 (25.7%)                                                             | 2385 (28.2%)                                     | 265 (25.0%)                                                            |
| Education                                               |                     |                                                                          |                                                  |                                                                        |
| Junior high school                                      | 368 (1.4%)          | 244 (1.4%)                                                               | 107 (1.3%)                                       | 17 (1.6%)                                                              |
| High school                                             | 6953 (25.7%)        | 4381 (25.0%)                                                             | 2284 (27.0%)                                     | 288 (27.2%)                                                            |
| Vocational school, junior college, or technical college | 6544 (24.2%)        | 4378 (25.0%)                                                             | 1913 (22.6%)                                     | 253 (23.9%)                                                            |

|                                          |               |              |              |             |
|------------------------------------------|---------------|--------------|--------------|-------------|
| University or graduate school            | 13171 (48.7%) | 8523 (48.6%) | 4147 (49.1%) | 501 (47.3%) |
| Number of employees                      |               |              |              |             |
| 1                                        | 2556 (9.5%)   | 1625 (9.3%)  | 848 (10.0%)  | 83 (7.8%)   |
| 2-49                                     | 7999 (29.6%)  | 5378 (30.7%) | 2320 (27.5%) | 301 (28.4%) |
| 50-999                                   | 9703 (35.9%)  | 6262 (35.7%) | 3036 (35.9%) | 405 (38.2%) |
| 1000-9999                                | 4719 (17.5%)  | 2986 (17.0%) | 1552 (18.4%) | 181 (17.1%) |
| ≥10000                                   | 2059 (7.6%)   | 1275 (7.3%)  | 695 (8.2%)   | 89 (8.4%)   |
| Sickness presenteeism days, median (IQR) | 0.0 (0-2)     | 0.0 (0-1)    | 0.0 (0-2)    | 4.0 (1-10)  |

IQR: interquartile range

1 Figure 1. Sickness presenteeism days under each treatment status

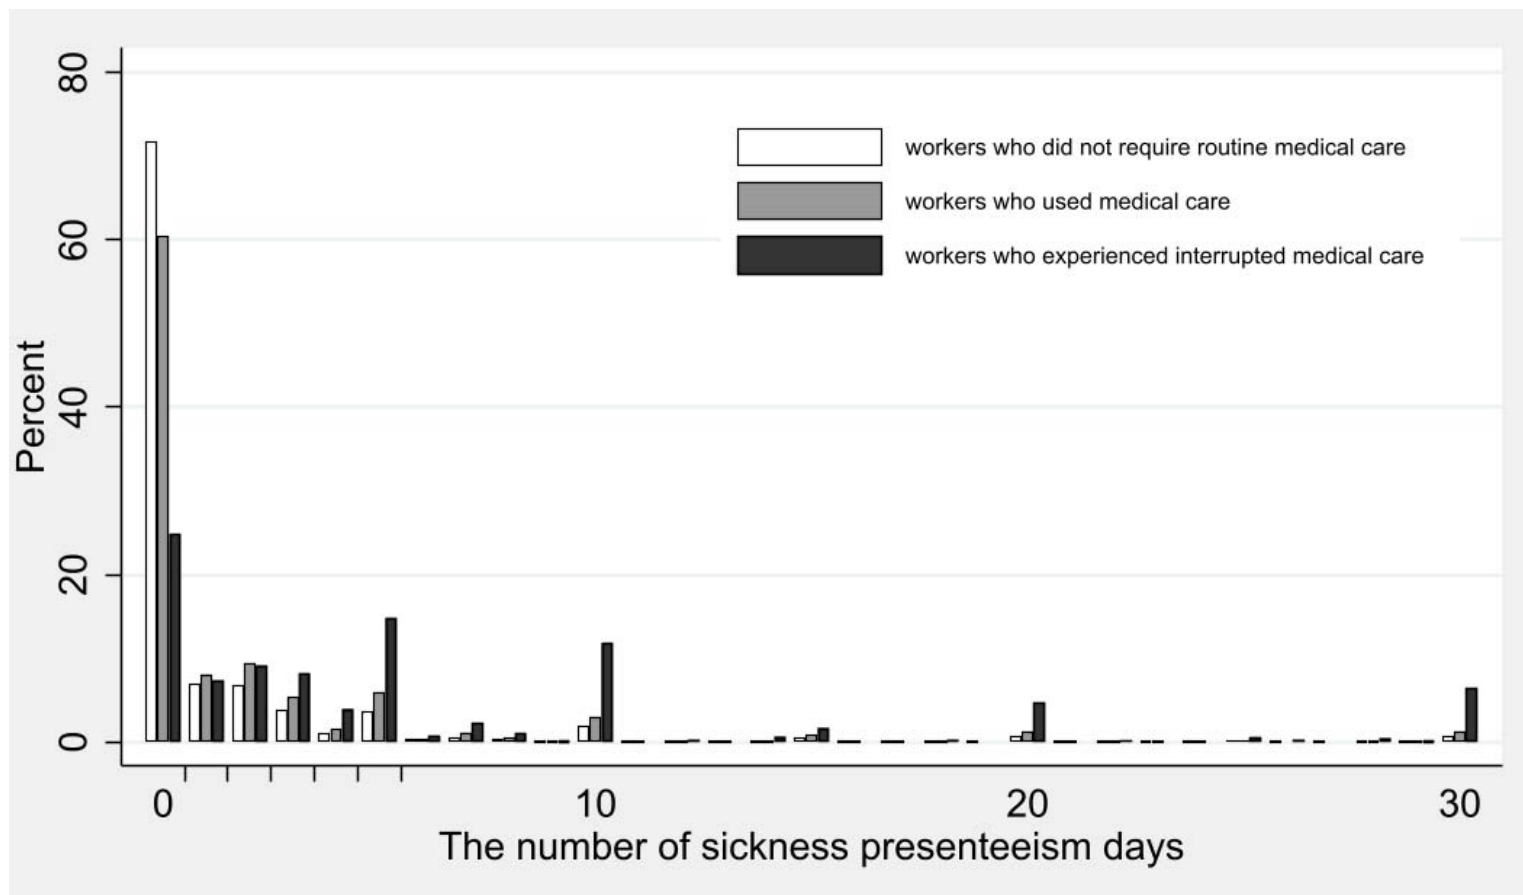

2



Table 2. Association between treatment status and sickness presenteeism

| Treatment status                                 | Univariate |           |          | Multivariate* |           |          |
|--------------------------------------------------|------------|-----------|----------|---------------|-----------|----------|
|                                                  | IRR        | 95% CI    | <i>p</i> | IRR           | 95% CI    | <i>p</i> |
| Workers who did not require routine medical care | Reference  |           |          | Reference     |           |          |
| Workers who used medical care                    | 1.13       | 1.06 1.21 | <0.001   | 1.15          | 1.08 1.22 | <0.001   |
| Workers who experienced interrupted medical care | 2.30       | 2.06 2.57 | <0.001   | 2.26          | 2.03 2.52 | <0.001   |

\*Adjusted for sex, age, marital status, household income, education, company size, job type, cumulative infection rate for COVID-19, and main symptoms

Offset variable: number of days worked per week

IRR: incidence rate ratio, CI: confidence interval

Table 3. Association between main symptoms and sickness presenteeism

| Main symptom                                                           | IRR       | 95% CI |      | <i>p</i> |
|------------------------------------------------------------------------|-----------|--------|------|----------|
| No problem                                                             | Reference |        |      |          |
| Pain                                                                   | 1.03      | 0.92   | 1.15 | 0.587    |
| Movement                                                               | 1.28      | 1.11   | 1.48 | 0.001    |
| Tightness, loss of energy, appetite, fever, dizziness, or feeling poor | 1.35      | 1.21   | 1.50 | <0.001   |
| Toileting or elimination                                               | 0.97      | 0.81   | 1.17 | 0.780    |
| Mental health                                                          | 1.67      | 1.52   | 1.83 | <0.001   |
| Skin, hair, or beauty                                                  | 0.90      | 0.75   | 1.09 | 0.284    |
| Sleep                                                                  | 1.05      | 0.95   | 1.17 | 0.352    |
| Eyes                                                                   | 0.86      | 0.75   | 0.98 | 0.024    |
| Nose                                                                   | 0.68      | 0.49   | 0.95 | 0.023    |
| Ears                                                                   | 0.85      | 0.63   | 1.15 | 0.299    |
| Other                                                                  | 1.35      | 1.18   | 1.54 | <0.001   |

Adjusted for sex, age, marital status, household income, education, company size, job type, cumulative infection rate for COVID-19, and treatment status

Offset variable: number of days worked per week

IRR: incidence rate ratio, CI: confidence interval

1 Figure 2. Predictive margins of each treatment status and symptom

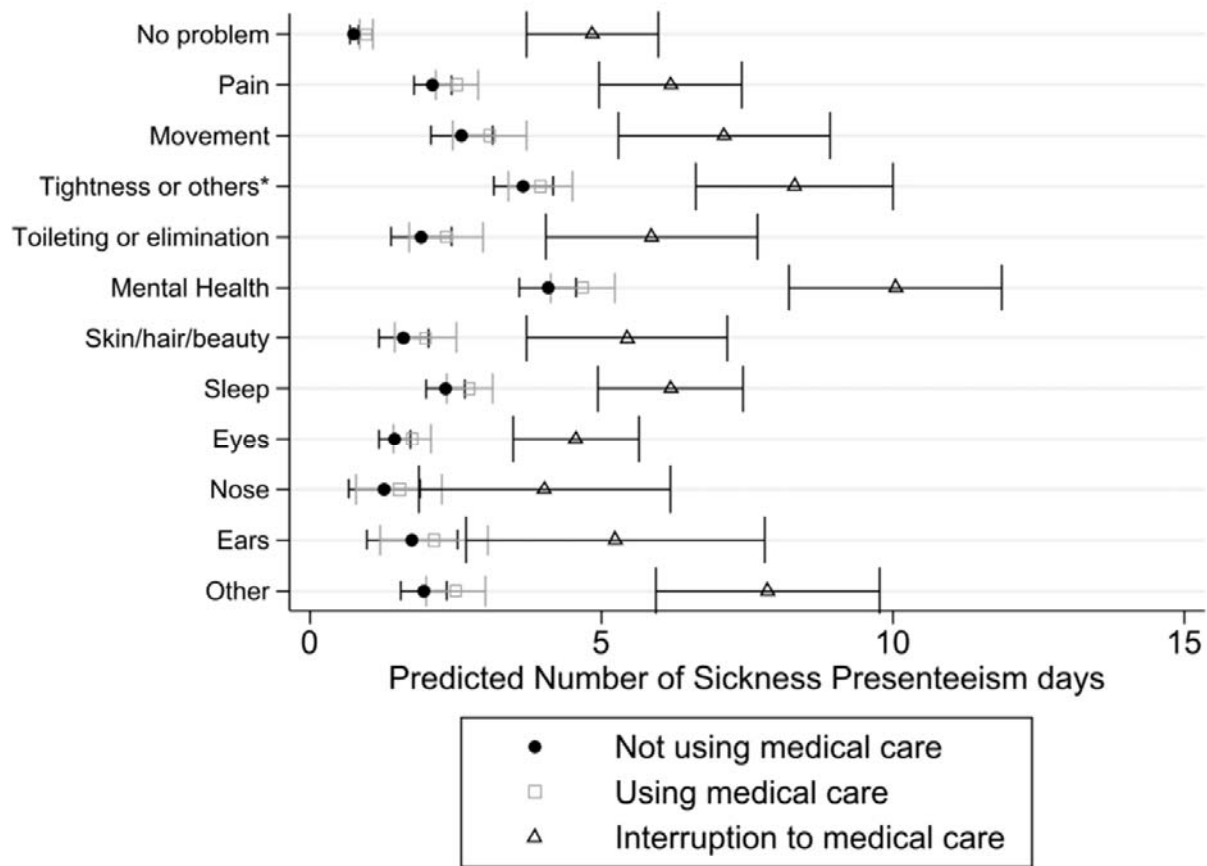

2

3 \*others include loss of energy, appetite, fever, dizziness, or feeling poor
